# Supplementary material
Source: PubMed Central journal article supplement (PMC2657309)
Supplement: supp_90_9_1830__1.pdf [file supp_90_9_1830__1.pdf]

TABLE E-1 The Informed-Decision-Making Model<sup>3</sup>

| Dimension of Informed Decision-Making | Element                                                                                                                                                                                                           |
|---------------------------------------|-------------------------------------------------------------------------------------------------------------------------------------------------------------------------------------------------------------------|
| Providing relevant information        | Discuss nature of decision<br><i>What are the essential clinical issues that we are addressing?</i>                                                                                                               |
|                                       | Describe alternatives<br><i>What are the clinically reasonable choices?</i>                                                                                                                                       |
|                                       | Discuss pros and cons<br><i>What are the pros and cons of relevance to this patient?</i>                                                                                                                          |
|                                       | Discuss uncertainty<br><i>How can I convey the likelihood of success?</i>                                                                                                                                         |
| Fostering patient involvement         | Assess understanding<br><i>Is the patient now an “informed participant,” with a working understanding of the decision?</i>                                                                                        |
|                                       | Discuss patient’s role<br><i>What role should the patient play in making the decision? Patients should be offered a role in decision-making, even if some will decline, preferring to defer to the physician.</i> |
|                                       | Explore “context”<br><i>How will the decision impact the patient’s daily life?</i>                                                                                                                                |
|                                       | Assess patient’s desire for others’ input<br><i>Who else would the patient like to consult?</i>                                                                                                                   |
|                                       | Explore patient’s preference<br><i>On the basis of the information given, which way is the patient leaning?</i>                                                                                                   |
